# 1       **Exercise and brain health in patients with coronary artery disease:** 2       **study protocol for the HEART-BRAIN randomized controlled trial**

3       **Angel Toval\*<sup>1</sup>, Patricio Solis-Urra<sup>1,2</sup>, Esmée A Bakker<sup>1,3</sup>, Lucía Sánchez-Aranda<sup>1</sup>, Javier**  
4       **Fernández-Ortega<sup>1</sup>, Carlos Prieto<sup>1</sup>, Rosa María Alonso-Cuenca<sup>1,4</sup>, Alberto González-García<sup>5</sup>,**  
5       **Isabel Martín-Fuentes<sup>1</sup>, Beatriz Fernandez-Gamez<sup>1</sup>, Marcos Olvera-Rojas<sup>1</sup>, Andrea Coca-**  
6       **Pulido<sup>1</sup>, Darío Bellón<sup>1</sup>, Alessandro Sclafani<sup>1</sup>, Javier Sanchez-Martinez<sup>1</sup>, Ricardo Rivera-López<sup>6</sup>,**  
7       **Norberto Herrera-Gómez<sup>1,4</sup>, Rafael Peñafiel-Burkhardt<sup>6</sup>, Víctor López-Espinosa<sup>6</sup>, Sara Corpas-**  
8       **Pérez<sup>4</sup>, María Belén García-Ortega<sup>6</sup>, Alejandro Vega-Cordoba<sup>6</sup>, Emilio J. Barranco-Moreno<sup>1</sup>,**  
9       **Francisco J. Morales-Navarro <sup>1</sup>, Raúl Nieves<sup>1</sup>, Alfredo Caro-Rus<sup>1</sup>, Francisco J. Amaro-**  
10       **Gahete<sup>7,8,11</sup>, Jose Mora-Gonzalez<sup>1</sup>, Sol Vidal-Almela<sup>1</sup>, Anna Carlén<sup>1,9</sup>, Jairo H. Migueles<sup>1</sup>, Kirk**  
11       **I. Erickson<sup>10</sup>, Eduardo Moreno-Escobar<sup>4,11</sup>, Rocío García-Orta<sup>6,11</sup>, Irene Esteban-Cornejo<sup>1,8,11</sup>,**  
12       **Francisco B. Ortega\* <sup>1,11,12</sup>**

13       <sup>1</sup> Department of Physical and Sports Education, Sport and Health University Research Institute (iMUDS), Faculty of Sport  
14       Sciences, University of Granada, Spain.

15       <sup>2</sup> Faculty of Education and Social Sciences, University Andres Bello, Viña del Mar, Chile.

16       <sup>3</sup> Department of Primary and Community Care, Radboud university medical center, Nijmegen, the Netherlands

17       <sup>4</sup> Cardiology Service, San Cecilio Clinical University Hospital, Granada, Spain

18       <sup>5</sup> Department of Nursing, Faculty of Health Sciences, University of Granada, Spain

19       <sup>6</sup> Cardiology Service, Virgen de Las Nieves University Hospital, Granada, Spain

20       <sup>7</sup> Department of Physiology, Faculty of Medicine, University of Granada, Granada, Spain

21       <sup>8</sup> CIBER de Fisiopatología de la Obesidad y Nutrición (CIBEROBN), Instituto de Salud Carlos III, Granada, Spain.

22       <sup>9</sup> Department of Clinical Physiology in Linköping, and Department of Health, Medicine and Caring Sciences, Linköping  
23       University, Linköping, Sweden

24       <sup>10</sup> AdventHealth Research Institute, Neuroscience, Orlando, USA

25       <sup>11</sup> Instituto de Investigación Biosanitaria ibs.GRANADA, Granada, Spain

26       <sup>12</sup> Faculty of Sport and Health Sciences, University of Jyväskylä, Jyväskylä, Finland.

## 27       \* **Correspondence:**

28       Corresponding authors: Francisco B. Ortega and Angel Toval. Department of Physical Education and  
29       Sports, Faculty of Sports Science, University of Granada; Carretera de Alfacar, 21. Granada 18071,  
30       Spain; +(34) 958 24 66 51, fax: +(34) 958 24 94 28; email: ortegaf@ugr.es and  
31       j.angel.toval@gmail.com

32       **Trial Sponsor:** University of Granada; Crtra. Alfacar, 21. Granada 18071, Spain; +(34) 958 24 66 51

33       **Keywords:** ischemic disease, coronary heart disease, cerebral blood flow, cognition, executive  
34       function, fitness, HIIT, resistance training

35       **Trial registration:** ClinicalTrials.gov: NCT06214624

38 **ABSTRACT**

39 **Introduction:** Patients with coronary artery disease (CAD), also called coronary heart disease, have a  
40 higher risk of developing cognitive impairment and mental health disorders compared to the general  
41 population. There is a need to identify effective and sustainable strategies to improve brain health in  
42 individuals with CAD, in which physical exercise could play a major role. The overall goal of the  
43 HEART-BRAIN randomized controlled trial (RCT) is to investigate the effects of exercise, including  
44 different types, on brain health outcomes in patients with CAD, and the underlying mechanisms.

45 **Methods:** This three-arm, single-blinded RCT will include 90 adults with CAD, aged 50-75 years. The  
46 participants will be randomized into: 1) control group - usual care (n=30), including periodic medical  
47 visits and medication management, 2) aerobic high-intensity interval training (HIIT) (n=30), or 3)  
48 aerobic HIIT combined with resistance exercise training (n=30). The intervention will last 12 weeks,  
49 offering 3 sessions (45min each) per week to the exercise groups, and the study outcomes will be  
50 assessed at baseline and after the intervention. The primary outcome of the study is to determine  
51 changes in global and regional cerebral blood flow assessed by magnetic resonance imaging.  
52 Secondary outcomes include changes in brain vascularization, cognitive measures (i.e., general  
53 cognition, executive function and episodic memory), and cardiorespiratory fitness. Additional health-  
54 related outcomes will be evaluated, and several potential mediators and moderators will be investigated  
55 (i.e., brain structure and function, cardiovascular and brain-based biomarkers, hemodynamics, physical  
56 function, body composition, mental health, and lifestyle behavior).

57 **Conclusions:** The HEART-BRAIN RCT will provide novel insights on how exercise can impact brain  
58 health in patients with CAD and the potential mechanisms explaining the heart-brain connection, such  
59 as changes in cerebral blood flow. The results might have important clinical implications by increasing  
60 the evidence on the effectiveness of exercise-based preventive strategies that could delay cognitive

61 decline in this high-risk CAD population. Our findings will be relevant for patients with CAD,  
62 researchers and healthcare providers involved in CAD-related clinical care.

## 63 1 INTRODUCTION

64 More than 300 million people globally are currently living with coronary artery disease (CAD), also  
65 called coronary heart disease, (1), which consists of a narrowing or blockage of the coronary arteries  
66 mainly caused by atherosclerosis. CAD is the most prevalent cardiovascular disease and a leading  
67 cause of mortality and morbidity worldwide (1-5). CAD incurs a significant economic burden, with  
68 annual costs estimated at €77 billion in the EU and \$239.9 billion in the USA (3, 6). Recent studies  
69 have shown that individuals with CAD are at high risk of accelerated decline in cognitive and mental  
70 health compared to aged-matched adults without CAD, supporting a nexus between the heart and the  
71 brain (7-11). Indeed, the cardiovascular risk factors associated with CAD similarly predispose  
72 individuals to cerebrovascular disease, in turn affecting their cerebral perfusion. While pharmaceutical  
73 therapies have traditionally been the cornerstone of CAD treatment, exercise is an effective non-  
74 pharmaceutical intervention for improving cardiometabolic health in these patients (12-15). However,  
75 the potential effect of exercise on brain health among individuals with CAD, as well as the mechanisms  
76 underlying the heart-brain connection, remain unknown.

77 A key physiological mechanism modulating the heart-brain connection might involve the intricate  
78 machinery responsible for supplying blood to the brain. Chronic cerebral hypoperfusion, marked by  
79 reduced cerebral blood flow (CBF), impedes the brain's access to vital oxygen and nutrients (9, 16-18).  
80 Therefore, a disrupted CBF could play an important role by accelerating cognitive decline and  
81 increasing the risk of dementia and mental health disorders in patients with CAD. In turn, exercise  
82 could serve as a pivotal factor to enhance CBF, offering a promising non-pharmaceutical adjunct  
83 therapy. Limited evidence suggests that exercise may increase CBF and induce brain angiogenesis (i.e.,  
84 growth of new capillaries). However, these findings are mainly derived from observational evidence  
85 and animal studies (19, 20). These hypotheses need to be tested in randomized controlled trials (RCTs)

86 in humans. The most advanced neuroimaging techniques (particularly in magnetic resonance imaging,  
87 MRI) allow non-invasive (no contrast) methods to assess *in vivo* CBF using the Arterial Spin Labelled  
88 sequence (ASL-MRI) and cerebral vascularization using magnetic resonance angiography (MRA) (21).  
89 These state-of-the-art techniques can provide unique and novel information about the connection of  
90 these two possible mechanisms (i.e. changes in CBF and cerebral vascularization) with cognition and  
91 mental health.

92 Physical exercise is strongly recommended in the clinical management of patients with CAD to reduce  
93 disease progression and the risk of major cardiovascular events (13, 22). However, the mechanisms by  
94 which different types and doses of exercise induce a variety of physiological responses are still not  
95 fully understood. For instance, modalities such as high-intensity interval training (HIIT) or its  
96 combination with resistance training are understudied. HIIT may offer superior health benefits, such  
97 as larger improvements in cardiorespiratory fitness, compared to moderate intensity continuous  
98 training (MICT) in patients with CAD (8–11). However, it is unknown if HIIT is also superior for  
99 improving brain health outcomes. On the other hand, resistance training and the combination of aerobic  
100 and resistance training remain understudied, despite recommendations by the World Health  
101 Organization (WHO) (23) and the European and American clinical guidelines for CAD management  
102 (12) (14, 24), all advocating for the combination of aerobic and resistance training for optimal health  
103 benefits (12, 13). Since one of the most documented benefits of exercise is the improvement in  
104 cardiorespiratory fitness (25-27), and this marker has been consistently linked to better brain health  
105 outcomes (28, 29), cardiorespiratory fitness might serve as a potential mediator of the beneficial effects  
106 of exercise on the HEART-BRAIN outcomes.

107 Based on the existing research gaps, we have designed the HEART-BRAIN project, an RCT to  
108 investigate the effects of exercise training on brain health outcomes in patients with CAD, including

109 the underlying mechanisms of the heart-brain connection. Herein, we describe the rationale and  
110 methodology of the HEART-BRAIN RCT.

## 111 **1.1 Study objectives**

112 The overall objective of the HEART-BRAIN trial is to investigate the effects of exercise on brain  
113 health outcomes in patients with CAD.

114 The primary objective of the study is to investigate the effects of aerobic HIIT and aerobic HIIT plus  
115 resistance training compared to usual care (i.e. no exercise training) on global and regional CBF in  
116 individuals with CAD.

117 Secondary objectives: to determine the effects of aerobic HIIT, and aerobic HIIT plus resistance  
118 training compared to usual care on (i) cerebral vascularization, (ii) executive function and general  
119 cognition, and (iii) cardiorespiratory fitness. Additionally, we will investigate the role of potential  
120 moderators and mediators (see details in statistical analysis section) on the expected effects.

121 Tertiary objectives: to determine the effects of aerobic HIIT, and aerobic HIIT plus resistance training,  
122 compared to usual care on additional outcomes related to cardiovascular and brain health, such as brain  
123 structure and function, inflammatory, cardiovascular and brain-based biomarkers, cardiac, vascular and  
124 transcranial non-invasive hemodynamics, physical function, body composition, mental health and  
125 lifestyle behavior.

126 Our primary hypothesis is that both exercise groups will have a greater increase in CBF compared to  
127 the usual care control group, in which HIIT plus resistance training might have a larger effect size than  
128 HIIT only.

129

## 130 2 METHODS AND ANALYSIS

### 131 2.1 Design and ethics

132 The HEART-BRAIN trial is a single-centered, three-armed, single-blinded RCT, in which 90 adults  
133 with CAD, between 50-75 years old, living in Granada (Spain), will be enrolled (**Figure 1**). Participants  
134 meeting the eligibility criteria will be randomized into three groups: 1) aerobic HIIT exercise program  
135 (n=30), 2) aerobic HIIT plus resistance training exercise program (n=30), and 3) control group - usual  
136 care (n=30). The group receiving usual care will be treated as standard care in Spain which includes  
137 periodic medical revisions and medication control. The two exercise groups will undertake a 12-week  
138 supervised exercise program. All the study outcomes will be assessed at baseline and during the 12-  
139 week follow-up. Lifestyle behaviors will also be evaluated at mid-point (6 weeks).

140 Eligible participants will receive written information about the study objectives and design, and will  
141 provide informed consent before participation. The trial protocol is in accordance with the principles  
142 of the Declaration of Helsinki and was approved by the Research Ethics Board of the Andalusian  
143 Health Service (CEIM/CEI Provincial de Granada; #1776-N-21 on December 21<sup>st</sup>, 2021). The RCT is  
144 registered on Clinicaltrials.gov (NCT06214624; submission date: December 22<sup>nd</sup>, 2023) and the study  
145 protocol and statistical analysis plan were uploaded before the last participants were randomized  
146 (submission date: January 29<sup>th</sup>, 2024). The study has been designed following the Standard Protocol  
147 Items for Randomized Interventional Trials (SPIRIT) (30, 31) and the SPIRIT-Outcomes 2022  
148 Extension (32) (**Supplementary Table 1**). Any significant changes to the protocol will be reported to  
149 the trial registry and the Research Ethics Board, which is in line with the SPIRIT guidelines. Moreover,  
150 participants in the HEART-BRAIN trial are insured under a social responsibility policy from the  
151 University of Granada, which covers ancillary services, post-trial care or compensation if necessary.  
152 There are no financial rewards provided to participants for their involvement in the study.

## 153 **2.2 Recruitment and screening**

154 Participants with CAD will be recruited from two public hospitals in Granada, Spain: the “Hospital  
155 Universitario Virgen de las Nieves” and the “Hospital Universitario Clínico San Cecilio”. Recruitment  
156 started in May 2022, and we plan to enroll a minimum of 90 patients, aged 50-75, with stable CAD  
157 (phase III) proven by invasive coronary angiography or CT with at least one coronary stenosis with >  
158 50% luminal reduction. A complete list of eligibility criteria is presented in **Table 1**. Eligible patients  
159 will be screened by the clinical and research team in three steps (**Figure 1**): 1) screening by the  
160 clinicians of the research team (i.e., based on clinical history); 2) screening based on a phone call  
161 conducted by the research team; and 3) screening during the baseline assessments including the  
162 cardiopulmonary exercise test (CPET) and echocardiography. Participants will be recruited in waves,  
163 with 10 to 20 people in each wave, throughout the year. In accordance with the CONSORT flow  
164 diagram (33), we will note the number of patients that were assessed for eligibility by the clinical and  
165 research team, the number of excluded patients (indicating reason for exclusion) during the enrollment  
166 phase and the number of randomized participants. For the allocation, the number of participants  
167 allocated to the intervention groups and the number of participants who received the intervention (with  
168 reasons for nonadherence to the allocated arm) will be noted. The number of participants who were  
169 lost to follow-up (dropouts) and who discontinued the intervention (including reasons) will be reported.  
170 Finally, the number of participants that were included in the analyses using the intention-to-treat and  
171 per-protocol databases will be described together with the reasons for the exclusion from the analytic  
172 database.

## 173 **2.3 Randomization**

174 Randomization will occur on a rolling basis and only after the completion of all baseline assessments,  
175 through REDCap Software (34). Participants will be randomized using a 1:1:1 ratio and stratified by



176 age (<65 years or  $\geq$  65 years) and sex (female or male). To ensure adequate allocation concealment,  
177 this procedure will be carried out by a blinded external researcher (Dr. Cabanas-Sanchez, Autonomous  
178 University of Madrid, Spain).

## 179 **2.4 Blinding**

180 Participants cannot be blinded due to the nature of the interventions, as they will inevitably become  
181 aware of their group allocation. Nonetheless, the principal investigator (PI) and the research team  
182 members participating in the post-intervention evaluations (who are not involved in monitoring the  
183 exercise sessions) will be blinded to the group assignments. Unblinding will only occur in case of an  
184 unexpected adverse event involving a participant and will only be done by the PI or a physician.

## 185 **2.5 Interventions**

186 A detailed and broader description of the program will be further extended in the Consensus on  
187 Exercise Reporting Template (CERT) study protocol of the HEART-BRAIN trial (*manuscript in*  
188 *preparation*). Briefly, participants will be randomized to one of the following three groups:

189 Aerobic high-intensity interval training (HIIT). 12-week duration, 3 times/week. This consists of a 4x4  
190 HIIT (preferably on the treadmill): 4 intervals of 4 minutes at high intensity (85-95% of HRmax),  
191 interspersed with 3 intervals of 3 minutes of active resting at  $\sim$ 70% of HRmax. All sessions include 10  
192 minutes of warm-up and 10 minutes of cool-down, resulting in a total session time of 45 minutes.  
193 During the familiarization period (first two weeks), participants will progress from moderate-intensity  
194 training to the target HIIT.

195 Aerobic HIIT plus resistance training. 12-week duration, 3 times/week. The aerobic part consists of a  
196 3x4 HIIT (preferably on treadmill), with 3 intervals of 4 minutes at high intensity (85-95% of HRmax),

197 interspersed with 2 intervals of 3 minutes of active resting (~70% of HRmax). The resistance part  
198 consists of 2 rounds of an 8-exercise circuit (a combination of upper and lower body exercises using  
199 elastic bands and body weight) with a ratio of 20 seconds of effort followed by 40 seconds of resting.  
200 Sessions will have 5 minutes of warm-up on the treadmill and 5 minutes of cool-down walking around  
201 the gym, for a total session time of 45 minutes.

202 Control group – usual care. The control group will be treated as usual in outpatient Phase III, which in  
203 Spain includes periodic medical revisions where the clinician may provide patients with lifestyle and  
204 clinical advice (e.g., inform about exercise limitations, if any, and nutrition recommendations, stress  
205 management) and medication control. In addition, in the control group, we will apply the wait-list  
206 strategy, offering participants the HIIT supervised program described above, once data collection for  
207 pre- and post-intervention assessments is completed.

208 All intervention groups will receive the same usual care. The HIIT program and the HIIT part of the  
209 combined HIIT plus resistance training program have been designed based on the guidelines for the  
210 delivery and monitoring of HIIT in clinical populations (35) and meet the aerobic recommendations of  
211 the WHO guidelines, as it surpasses the minimum of 75 minutes of vigorous intensity or 150 minutes  
212 of moderate intensity per week, or a combination of them (23). The combined HIIT plus resistance  
213 training program meets the aerobic and resistance components of the WHO recommendations, as it has  
214 3 sessions of resistance training per week while WHO guidelines recommend at least 2 sessions  
215 involving major muscle groups. Both exercise programs have been designed to provide an estimated  
216 isocaloric workload (same energy expenditure) in terms of intensity and duration.

217 Exercise programs will take place in the Sport and Health University Research Institute (iMUDS) at  
218 the University of Granada. Accredited expert trainers with a BSc degree in sports sciences will lead all

219 supervised sessions with a ratio of 1:1 (one trainer, one participant). Exceptionally (e.g., scheduling  
220 conflicts), a ratio of 1:2 will be used.

221 Both training programs are individually tailored. Exercise prescription, monitoring, and decisions for  
222 progression will be based on the percentage of HRmax and the 10-point Borg Rating of Perceived  
223 Exertion scale (RPE) (36). HRmax will be determined during the CPET with electrocardiogram (ECG)  
224 and gas exchange analyzer performed at baseline (see section 2.3.2). Furthermore, symptoms and blood  
225 pressure will be monitored before, during, and after the exercise sessions. Participants taking beta-  
226 blocker medications often have a blunted HR response (35), which could also affect the HRmax  
227 obtained in the CEPT. Thus, while the HRmax will be used as a reference for exercise intensity,  
228 participants will be encouraged to learn and use RPE. This indicator will be used as a reference in case  
229 of discordance between HR and RPE targets. In addition, the trainers will use their judgment to adapt  
230 the intensity, particularly during the resistance training, because RPE might be less reliable in  
231 inexperienced participants (35).

## 232 **2.6 Adherence, attendance, and compliance**

233 Since the term adherence has been used with different meanings in the literature, in our study we will  
234 refer to two concepts more unequivocally used: attendance and compliance. Attendance will be defined  
235 as the percentage of sessions attended by the participant (recorded by the trainers) divided by the  
236 number of exercise sessions offered (12 weeks x 3 sessions/week = 36, yet holidays and logistic reasons  
237 may lead to slight deviations among waves and participants). Compliance will be defined as the  
238 percentage of sessions in which the specified amount of time (i.e., HIIT 6.5 min and HIIT plus  
239 resistance training 4.5 min) is spent within the target HR intensity, divided by the number of exercise  
240 sessions with valid data (e.g., sessions with technical issues of the HR bands will be excluded). The  
241 familiarization phase (i.e., the first two weeks of the exercise intervention) will not be considered for

242 the compliance calculation. The amount of time, i.e., HIIT 6.5 min; HIIT plus resistance training 4.5  
243 min, in the target HR intensity is based on the exercise protocol and the guidelines for HIIT prescription  
244 and monitoring in clinical populations (35): “for the first high-intensity interval, allow the entire 4-  
245 minute period to reach the HR target zone, for subsequent high intensity intervals (i.e., 2nd, 3rd, and/or  
246 4th), allow 2-minutes (halfway) to reach the HR target zone”.

247 All protocol deviations will be recorded and reported (e.g., change in pre-defined inclusion/exclusion  
248 criteria, baseline and post assessments, data cleaning/processing).

## 249 **2.7 Safety and adverse events**

250 Although HIIT has been shown to be low risk in patients with CAD (37-39), the safety of our  
251 participants is the highest priority in the study. For these purposes, we followed the guidelines for using  
252 HIIT in clinical populations and have applied in our study the recommended exclusion criteria (35).  
253 Further, CPET together with cardiac and vascular ultrasound will be performed at baseline and serve  
254 as a clinical assessment to confirm the absence of underlying conditions that contraindicate exercise.

255 The center where the exercise training sessions will be delivered (iMUDS) is located in the Hospital  
256 area next to the emergency unit (200 meters) and the ambulance unit (600 meters). A trained allied  
257 health professional (nurse or physician) will be present in the center during the training sessions to  
258 guarantee a timely response in case of an adverse event. The center has a fully equipped trolley with a  
259 first aid kit and automatic defibrillator and obtained the Andalusian Certification of “Cardioprotected  
260 Center” (Decreto 22/2012 of February 14th). Furthermore, all members of the project team will receive  
261 certified training courses in cardiopulmonary resuscitation and the use of a semi-automatic  
262 defibrillator.

263 In case of an adverse event, we will follow the protocol recommended by the Spanish Council of  
264 Cardiopulmonary Resuscitation (CERCP). The number and reasons for adverse events (e.g., falls,  
265 injuries, musculoskeletal problems, major cardiovascular events, and any other events potentially  
266 related to the implementation of the trial protocol) occurring at any time during the study will be  
267 collected, reported, and separately described for each study arm. The participants allocated to the  
268 exercise group will be able to communicate any adverse events during their regular contact with the  
269 project team (i.e., 3 sessions/week), whereas those allocated to usual care will be asked to report any  
270 adverse event promptly, and will be called by phone for these regards at weeks 3, 9 and 12. Adverse  
271 events will be described in a table in the main HEART-BRAIN manuscript. Each adverse event will  
272 be clinically ascertained to judge whether the event was due to exercise in the corresponding study arm  
273 using an adverse event algorithm (i.e., Liverpool Causality Assessment Tool) (40) and recorded  
274 according to the Common Terminology Criteria for Adverse Events, (CTCAE) (41) by an experienced  
275 cardiologist (EME) after discussion and consensus with the rest of the cardiologists involved in the  
276 project.

## 277 **2.8 Outcomes**

278 The primary, secondary, and additional outcomes, the assessment instruments, and the data collection  
279 time points are summarized in **Table 2**. All outcome-related measures, data processing, and statistical  
280 analyses will be performed by staff blinded to the intervention assignment.

### 281 **2.8.1. Primary Outcome Measures:**

282 Change in cerebral blood flow (timepoint: baseline and 12-weeks): CBF (mL/100 g/min) will be  
283 measured using the MRI technique of pseudo-continuous arterial spin labeling (pCASL) (42, 43). We

284 will analyze both global and regional CBF, as determined by voxel-wise analysis to measure local  
285 perfusion (acquisition parameters in **Table 3**).

### 286 **2.8.2 Secondary Outcome Measures:**

287 Change in cerebral vascularization (baseline to 12 weeks): Cerebral vascularization will be measured  
288 using the time-of-flight-magnetic resonance angiography (TOF-MRA). This sequence allows imaging  
289 flow within vessels revealing the cerebrovascular anatomy without the need to administer contrast.  
290 Thus, the analysis of TOF-MRA provides the number, distribution, and morphology of intracranial  
291 vessels (acquisition parameters in **Table 3**).

292 Change in cognitive outcomes (baseline to 12 weeks): A comprehensive neuropsychological battery  
293 will assess several domains of cognition (**Table 4**). General cognition will be assessed by the Montreal  
294 Cognitive Assessment (MoCA) test (44). Additionally, the battery includes paper-and-pencil tests  
295 (Trail making test (45) and Digit Symbol Substitution Test (46)), National Institutes of Health (NIH)  
296 Toolbox tests (Dimensional Change Card Sort Test, Flanker Test, Picture Sequence Memory Test, and  
297 List Sort Working Memory Test) (47) and a programmed test in E-prime software (Spatial Working  
298 Memory Test) (48). Detailed information about the cognitive tests has been previously described (49).  
299 The cognitive indicators will be transformed into standardized z-scores by calculating the difference  
300 between each individual raw score and the group average score at baseline, and then dividing by the  
301 standard deviation at baseline. We will determine the effects of the interventions on the cognitive  
302 outcomes (e.g., general cognition, cognitive flexibility, inhibition control, working memory,  
303 processing speed and episodic memory). To guarantee reliable evaluations, all paper-and-pencil tests  
304 will be independently scored by two trained evaluators, with any discrepancies resolved through mutual  
305 agreement.

306 Change in cardiorespiratory fitness (baseline to 12 weeks). Cardiorespiratory fitness will be assessed  
307 by a standardized ramp CPET to exhaustion on a treadmill (h/p/cosmos, Nussdorf, Germany), in  
308 accordance with the American College of Sports Medicine Guidelines (50). We decided to use a ramp  
309 protocol with small increments, and opted for a standardized, instead of individualized, protocol to be  
310 able to compare the time-to-exhaustion (test duration, excluding warm-up) between participants as an  
311 additional indicator of exercise capacity and cardiorespiratory fitness, in addition to the peak oxygen  
312 uptake. CPET will be carried out by trained staff and under the supervision of a physician. The protocol  
313 begins with a 3-minute warm-up phase, during which the speed gradually increases to 4.8 km/h.  
314 Following this, the slope will be increased by 1% every 30 seconds until exhaustion or any other  
315 indication for test cessation (50), followed by a 3-minute recovery phase. This ramp protocol equates  
316 the 3-min increment Bruce tests, as indicated in the American College of Sports Medicine Guidelines  
317 (50). The respiratory exchange will be monitored with a dilution flow system (Omincal, Maastricht  
318 Instruments, Maastricht, the Netherlands), generating output data at 5-second intervals. A 12-lead  
319 electrocardiogram (AMEDTEC ECGpro, GmbH, Aue, Germany) will be continuously monitored by a  
320 physician during the test. Heart rate will also be registered with a Polar H10 monitor (including chest  
321 band and watch). Systolic and diastolic blood pressures will be measured with an automatic  
322 sphygmomanometer (Tango M2; SunTech Medical Inc., NC, USA) every 3 minutes during exercise,  
323 and after 3 and 5 minutes of recovery. The RPE will be asked every 3 minutes during the test (51).  
324 Peak oxygen uptake (Peak  $\dot{V}O_2$ ) will be defined as the highest rolling 30-second average during the  
325 test. Since the heart rate response might be blunted due to beta-blockers and the oxygen uptake plateau  
326 is not always observed, staff will note whether participants reach a respiratory exchange ratio (RER)  
327 of 1.1 or higher, as RER is one of the most robust indicators of maximal effort in these patients.

328

329

### 330 **2.8.3 Other Outcome Measures:**

#### 331 **Brain structure and function**

332 CBF (primary outcome), cerebral vascularization (secondary outcome), along with other brain  
333 structure and function outcomes will be assessed by MRI at the Mind, Brain and Behavior Research  
334 Centre (CIMCYC) at the University of Granada. A Siemens Magnetom PRISMA Fit 3T scanner with  
335 a 64-channel head coil will be used. **Table 3** shows the imaging sequences that will be performed for  
336 each participant in acquisition order. Participants will be asked to wear comfortable clothing, MRI  
337 eligibility criteria will be checked (e.g., not having metallic implants or claustrophobia), and  
338 participants will provide additional informed consent specifically for MRI scans. When doubts exist  
339 about the compatibility of certain implants, an experienced radiologist will check the composition and  
340 material of the implant and inform about the compatibility with MRI before the scanning takes place.  
341 Standard MRI sequences will be conducted for approximately 60 minutes. A radiologist will review  
342 structural sequences to detect any incidental findings. If any of them are discovered, the radiologist  
343 will communicate with the participant for further examination. Besides CBF and cerebral  
344 vascularization, the following brain MRI outcomes will be examined (acquisition parameters are  
345 shown in **Table 3**):

346 Change in blood-brain barrier (BBB) permeability (baseline and 12 weeks). BBB permeability will be  
347 assessed by a recently developed neuroimaging technique that measures water exchange across the  
348 BBB using 3D diffusion-prepared arterial spin-labelled perfusion MRI (52).

349 Change in brain morphology (baseline and 12 weeks). MRI will measure brain morphology including  
350 volume, area, cortical thickness, and shapes by a T1-weighted MPRAGE (Magnetization Prepared  
351 Rapid Gradient Echo) structural sequence.



352 Change in white matter structure (baseline and 12 weeks). MRI will measure white matter  
353 microstructure by a diffusion-weighted acquisition sequence.

354 Change in brain function (baseline and 12 weeks). MRI will measure brain function during resting state  
355 and measures of brain activity and connectivity will be calculated.

### 356 **Biological samples**

357 The HEART-BRAIN trial aims to examine various biomarkers by the analysis of blood, saliva, and  
358 fecal samples. A trained nurse will collect blood samples from participants under fasting conditions  
359 (08:00 to 10:00 a.m.) at the Virgen de las Nieves University Hospital. For post-assessments, blood  
360 extraction will be done within the first 3-5 days after the last training session. Briefly, three  
361 ethylenediaminetetraacetic acid (EDTA) tubes, two citrate tubes, two serum tubes, and one PAXGENE  
362 tube will be collected corresponding to a total of approximately 30 ml of blood per participant visit.  
363 Part of the blood samples obtained from each participant will be processed directly at the Hospital (1  
364 EDTA, 1 citrate, and 1 serum tube), and the remaining samples will be aliquoted and stored at -80°C  
365 for later studies. Saliva samples will be collected into sterilized plastic containers and aliquoted into  
366 1.5mL Eppendorf. Fecal samples will also be collected under standardized conditions using sterile  
367 plastic containers and stored at -80°C. **Table 5** outlines the specifications of the samples, initial  
368 analyses, and preliminary analysis plans. Nevertheless, samples will be analyzed using the best  
369 available methods at the time of processing. Blood analyses will cover conventional biochemical  
370 measurements, cardiovascular, brain-peripheral, and inflammatory biomarkers, telomere length, and  
371 genetic analysis. Saliva and fecal samples will undergo metagenomic analysis to study the microbiome.  
372 Some of the analyses will be conducted as additional funding is obtained. Briefly, the main outcomes  
373 planned from biological samples include:

374 Change in cardiovascular biomarkers (baseline and 12 weeks). Blood samples will be used to determine  
375 concentrations of cardiovascular biomarkers including glucose, insulin, triglycerides, high-density  
376 lipoprotein (HDL), low-density lipoprotein (LDL), and total cholesterol.

377 Change in brain-peripheral biomarkers (baseline and 12 weeks). Blood and saliva samples will be used  
378 to determine the concentration of peripheral brain biomarkers such as brain-derived neurotrophic factor  
379 (BDNF), vascular endothelial growth factor (VEGF), insulin-like growth factor 1 (IGF-1), cathepsin  
380 B (CTSB), amyloid and tau protein levels, as well as novel neurodegenerative biomarkers based on  
381 new evidence available at the time of the analysis.

382 Change in inflammatory biomarkers (baseline and 12 weeks). Blood samples will be used to determine  
383 concentrations of inflammatory peripheral biomarkers such as tumor necrosis factor-alpha (TNF-  
384 alpha), interleukins, and both traditional and high-sensitivity C-reactive proteins.

385 Change in gene expression and epigenetics (baseline and 12 weeks). Blood samples will be stored for  
386 epigenetic and gene expression changes.

387 Change in oral and gut microbiota (baseline and 12 weeks). Saliva and fecal samples will be used to  
388 determine oral and gut microbiota including the most representative phyla (i.e., firmicutes,  
389 Bacteroidetes, and proteobacteria).

## 390 **Hemodynamics**

391 Hemodynamic changes (baseline and 12 weeks). Non-invasive hemodynamic parameters will be  
392 measured using ultrasound (Vivid E95, GE Healthcare) at three levels: 1) vascular (main carotid artery  
393 and vertebral artery, with measurements of intima-media thickness, flow, and wall strain, as well as  
394 registration of presence of atherosclerotic plaques), 2) cardiac (i.e., cardiac dimensions and volumes,

395 systolic and diastolic function such as ejection fraction, strain deformation, and myocardial work), and  
396 3) transcranial (i.e., systolic and diastolic flow velocity in the middle cerebral artery). Image acquisition  
397 and analysis will be carried out by cardiologists with expertise in ultrasonography.

398 Change in blood pressure (baseline and 12 weeks). Resting systolic and diastolic blood pressure will  
399 be assessed by a validated automated blood pressure monitor (Omron M3, Intellisense, OMRON  
400 Healthcare Europe, Spain) in the sitting position after 5 minutes of rest and with the left arm resting on  
401 a table at heart level. Three readings will be collected with 2-minute intervals in between. Blood  
402 pressure will be calculated as the average of the last two blood pressure readings (53).

403 Change in arterial stiffness (baseline and 12 weeks). Arterial stiffness will be assessed using the pulse  
404 wave analysis and carotid-femoral pulse wave velocity (aortic-PWV) by applanation tonometry  
405 determined by the SphygmoCor® XCEL PWA/PWV (AtCor Medical, Sydney, Australia).

#### 406 **Physical functioning and body composition**

407 Additional physical function and body composition outcomes will include:

408 Change in physical function and fitness (baseline and 12 weeks). The Senior Fitness Test, including  
409 the 6-min walking test) will be used to assess overall physical functioning. Senior Fitness Test battery  
410 assesses upper and lower body strength, aerobic capacity, walking speed, balance, and flexibility (54).  
411 Perceived physical fitness (cardiorespiratory fitness, muscular strength, speed-agility, flexibility and  
412 overall fitness) will be assessed using the International Fitness Scale (IFIS) (55). In addition, muscular  
413 strength will be measured with a combination of some of the Senior Fitness Test and handgrip strength  
414 test. In brief, each participant will be encouraged to perform the maximal isometric force twice with  
415 each hand using a hand dynamometer (TKK 5101 Grip D, Takey, Tokyo Japan). The maximum value  
416 of each hand will be taken and averaged in kilograms (kg) as an indicator of upper-body muscular

417 strength. Lower body muscular strength will be assessed using the chair stand test (number of  
418 repetitions). Upper body muscular strength will be assessed using the arm curl test (number of  
419 repetitions). Perceived strength will be assessed using a single item from the IFIS (55).

420 Change in body composition (Baseline and 12 weeks). Body mass index (BMI, kg/m<sup>2</sup>) will be  
421 computed from height and weight measured with SECA instruments following standardized  
422 procedures. Body composition (i.e., lean mass, kg, fat mass, kg, and bone mineral content and density,  
423 z-score) will be assessed using a dual-energy x-ray absorptiometer and a TANITA's Bioelectrical  
424 Impedance Analysis (TANITA MC-980MA-N plus, Amsterdam, the Netherlands). We will also  
425 conduct MRI of the abdominal region to obtain information on overall visceral adipose tissue, specific-  
426 organ adipose tissue, and subcutaneous abdominal adiposity.

#### 427 **Mental health and lifestyle behaviors**

428 A battery of questionnaires will be administered to evaluate the following dimensions in relation to  
429 mental health and lifestyle behavior:

430 Change in depressive symptoms (baseline and 12 weeks) will be assessed using the Global  
431 Deterioration Scale (56), and the Hospital Anxiety and Depression Scale (HADS) (57); change in  
432 anxiety symptoms (baseline and 12 weeks) will be assessed using the HADS questionnaire (57); change  
433 in stress (baseline and 12 weeks) will be assessed using the Perceived Stress Scale (58); change in  
434 loneliness (baseline and 12 weeks) will be assessed using the UCLA Loneliness Scale (59); change in  
435 self-esteem (baseline and 12 weeks) will be assessed using the Rosenberg Self-Esteem Scale (60);  
436 change in social support (baseline and 12 weeks) will be assessed using the Social Provisions Scale  
437 (61).

438 Change in health-related quality of life (baseline and 12 weeks) will be assessed using the SF-36 form  
439 (62), which provides an 8-scale profile of functional health and well-being scores (i.e., physical  
440 functioning; role limitations due to physical problems; bodily pain; general health perceptions;  
441 energy/vitality; social functioning; role limitations due to emotional problems; and mental health) as  
442 well as psychometrically-based Physical Component Score (PCS) and Mental Component Score  
443 (MCS).

444 Change in physical activity and sedentary behaviors (baseline, 6 and 12 weeks). Physical activity and  
445 sedentary behavior will be measured using the accelerometer Axivity AX at baseline and 6-weeks. The  
446 accelerometer will be attached to the non-dominant wrist for 9 consecutive days, the sampling  
447 frequency will be set at 100 Hz, and the accelerometer raw data processing will be conducted using  
448 open-source software tools to ensure transparency and replicability of the methods (63). Additionally,  
449 participants will complete the short version self-reported International Physical Activity  
450 Questionnaire(64) at baseline and 12 weeks.

451 Change in duration and sleep quality (baseline and 6 weeks). Sleep duration (hours/night) will be  
452 computed from the accelerometer Axivity AX and diaries, and an open-source software will be used  
453 to process the raw data recordings (63). In addition, participants will complete a single-item question  
454 on usual sleep duration. Sleep quality (e.g. sleep regularity, sleep efficiency, latency, number and total  
455 time of waking up after sleep onset) will also be assessed using the accelerometer Axivity AX.

456 Change in diet behaviors (baseline, 6 and 12 weeks). Diet behaviors will be self-reported using the 14-  
457 item Questionnaire of Mediterranean Diet Adherence (PREDIMED-14) with an additional question for  
458 supplement intake.

459 Additional variables related to health, lifestyle and genotype will be measured for descriptive purposes,  
460 for covariate adjustment in the analyses when necessary or for interaction with the intervention effects.  
461 Examples include biological sex, ethnicity, educational level, smoking habits, alcohol consumption,  
462 medication, comorbidities (e.g., dyslipidemia, hypertension, or type 2 diabetes), family history of  
463 dementia, handedness, and COVID-19 history. Additionally, genotyping at baseline will be conducted  
464 for well-known Single Nucleotide Polymorphisms (SNP) for brain health, such as Apolipoprotein E  
465 (APOE) and BDNF genotypes, and additional relevant SNPs based on an updated literature search.  
466 The genotyping analysis is conducted to test gene-exercise interaction as we have done in previous  
467 RCTs (49).

## 468 **2.9 Sample size and statistical analysis**

469 A detailed description of the statistical analysis plan, including a sample size calculation, for the  
470 HEART-BRAIN trial has been pre-registered and published on Clinicaltrials.gov (NCT06214624;  
471 submission date: January, 2024).

### 472 **2.9.1 Sample size**

473 The HEART-BRAIN project has been designed to detect a low-to-medium size change (i.e. effect size  
474 Cohen  $d=0.35$ ) with an alpha of 0.05 and beta of 0.2 (power 0.8). The trial has been powered for a 7%  
475 dropout during the intervention (based on our previous RCTs (49)). Thus, the estimated sample size,  
476 for repeated-measures ANOVA using G\*Power (version 3.1.9.7), was 90 participants (30 in each study  
477 arm).

## 478 **2.9.2 Framework and timing**

479 A superiority hypothesis testing framework will be used. In the main analyses, we will compare  
480 whether both exercise interventions (HIIT only or HIIT plus resistance training) are superior to usual  
481 care (no exercise training). The final analyses will be performed after collecting and processing the  
482 data of the primary and secondary outcomes. The time points for data collection of each outcome are  
483 explained in section 2.4.

## 484 **2.9.3 Statistical interim analyses and stopping guidance**

485 No pre-specified interim analyses will be performed, and therefore, a stopping guidance is not  
486 applicable. Basic analyses (not including the primary outcome) have been performed as required by  
487 the final report for the funding agencies, after completion of the first 58 participants. The basic analyses  
488 have been performed by a researcher who is not involved in data collection (EAB). The results of the  
489 basic analyses have not been discussed with other members of the research team involved in the  
490 evaluations or interventions to avoid any bias during the implementation of the study, data collection  
491 or processing. These basic analyses have not led to any protocol deviations.

## 492 **2.9.4 Brief description of the primary and secondary analyses**

493 The main analyses will consist of the intention-to-treat analyses for the primary and secondary  
494 outcomes using a constrained baseline (meaning baseline adjusted) linear mixed model, which  
495 accounts for baseline differences among the study groups. The model will include fixed effects for time  
496 (two levels) and treatment (three levels) as well as the unique participant identifier as a random effect.  
497 If the global test of significance indicates between-group differences, pairwise comparisons will be  
498 explored. Although no adjustments for multiplicity will be performed, family-wise type 1 error rate on  
499 the primary outcome will be retained by using a hierarchical analytic approach. The prespecified

500 hierarchical hypotheses will be tested using the prespecified sequence: HIIT plus resistance training  
501 versus usual care, HIIT versus usual care, and HIIT plus resistance training versus HIIT. No additional  
502 adjustments for covariates will be made (except for baseline adjustments of the outcome). The main  
503 statistical analyses will be performed by an independent researcher (EAB), who is not involved in the  
504 recruitment, evaluations, and interventions, and who will be blinded to treatment allocation by coding  
505 the intervention arms (e.g., A, B, C). The same approach will be applied to secondary and tertiary  
506 outcomes.

### 507 **2.9.5 Moderation, mediation, and other secondary analyses**

508 Although the RCT is not powered for subgroup analyses, we will perform moderation analyses by  
509 exploratory subgroup analyses for age, sex, education level, baseline level of the study outcome  
510 (stratified on the median), and APOE genotype. Likewise, we plan to explore potential mechanisms  
511 driving effects on outcomes. For example, we will run a formal mediation analysis to test whether  
512 changes in cardiorespiratory fitness explain exercise-derived changes in brain and cognitive outcomes,  
513 and whether changes in CBF or vascularization mediate exercise-derived changes in cognitive  
514 outcomes.

### 515 **2.9.6 Confidence intervals and P values**

516 All statistical tests will be two-tailed. P for significance will be set at 0.05 and 95% confidence intervals  
517 will be estimated. No adjustments for multiplicity will be made as multiplicity adjustments may be of  
518 lesser importance in the case of distinct treatment arms (65). Since only one primary outcome has been  
519 defined, other outcomes do not require adjustment for multiple testing. However, we will include a  
520 hierarchical analytic approach for the exercise interventions tested and the primary outcome.



## 521 **2.9.7 Analysis populations**

522 We plan to use two approaches for the statistical analyses:

523 1. Intention-to-treat (main analysis): This will be used for our primary analyses and includes all  
524 randomized participants. With this approach, all randomized participants are included in the analysis,  
525 based on the groups to which they were initially randomly assigned to. This implies that some  
526 participants will have valid data at both time points, while some might have missing data at baseline  
527 or post-intervention assessment, which is sometimes named as “available-case intention-to-treat”.

528 2. Per-protocol and additional sensitivity analyses: This dataset will be used for our secondary analyses  
529 and includes all participants with  $\geq 70\%$  attendance. Additionally, sensitivity analyses will be  
530 performed using the per-protocol database and excluding participants who had injuries or other health  
531 problems during the post-assessment evaluations. We will also analyze the effects of attendance and  
532 compliance by conducting an analysis including individuals who, in addition to attending  $\geq 70\%$  of the  
533 sessions, also had  $\geq 70\%$  compliance to the training protocol based on the time within the HIIT heart  
534 rate target zones.

## 535 **2.10 Data management and sharing**

536 The HEART-BRAIN trial will use two data storage systems: (i) the REDCap platform, an online  
537 software for the management of research databases in clinical trials and translational research. RedCap  
538 will be used for the storage and management of all non-imaging information, guarantying its trace and  
539 safety (34); (ii) the HEART-BRAIN desktop computer will also contain participants’ pseudonymized  
540 data collected on paper-based forms, that will be scanned and stored, as well as the MRI data. Physical  
541 copies of data collection forms and documents will be securely stored in a locked cabinet at the iMUDS  
542 facility. Upon enrolment in the trial, participants will be assigned a unique code to be used consistently

543 across all forms and data collection reports, i.e. pseudonymized data, to reduce the risk of exposure  
544 resulting from unintended unauthorized access or disclosure. In addition, information linking the  
545 pseudonym to the identifiable information must be kept separately and subjected to ensure non-  
546 attribution to an identified or identifiable individual. The PI will have access to the final dataset and  
547 will provide reasonable and responsible access to the pseudonymized data to other researchers.  
548 Participants will consent to the use of their pseudonymized data for secondary research, as outlined in  
549 the informed consent process. Once a participant is enrolled, all data will undergo thorough quality  
550 control checks and be archived following the storage protocol at iMUDS. Quality control measures  
551 include visual inspection of imaging data, double correction of paper-pencil cognitive tests, and  
552 verification of data validity and integrity in REDCap. The study will adhere to the FAIR principles  
553 (Findability, Accessibility, Interoperability, and Reusability), and meta-data will be made publicly  
554 available. A DOI (Digital Object Identifier) is issued to every published record. Governance, ethical  
555 considerations, and shared trial oversight will be prioritized, aligning with current best practices. Study  
556 results, including positive, negative, or inconclusive, will be disseminated through peer-reviewed  
557 journals, and national and international conferences, and shared via social media and press releases  
558 with participants, caregivers, physicians, and the broader medical and scientific community.

559 The protocol, statistical analyses plan and data management plan will be shared open access. Data files,  
560 including pseudonymized individual participant data, will be shared under restricted access and upon  
561 reasonable request (contact FBO) due to privacy issues and EU-GDPR regulations. In principle, all  
562 collected individual participant data will be available for sharing under the "as open as possible, as  
563 closed as necessary" principle. The shared data files will be pseudonymized, and only include  
564 participants who provided informed consent for sharing, and sharing is only possible when the data is  
565 used for research purposes related to exercise and cardiovascular and brain health. The individual  
566 participant data will be available 12 months after the primary outcome paper is published. The specific

567 process of data access will be determined in a later stage. In short, data will be made available upon  
568 reasonable requests to the PI (FBO). The data requests must contain the purpose and aim of the  
569 research, target variables, and data analysis plan before data sharing. Data will only be shared for  
570 research and public health purposes. A data access committee will be created to approve the appropriate  
571 data requests. A data monitoring committee does not exist in the funding system in Spain.

### 572 **3 DISCUSSION**

573 CAD is associated with cognitive and mental health impairment (7-10). However, the mechanisms  
574 explaining the connection between the heart and the brain in patients with CAD remain unknown (9).  
575 Growing evidence supports the benefits of exercise on the cardiovascular health of individuals with  
576 CAD (66-71). Yet, there is scarce knowledge on its influence on brain health. The mechanisms by  
577 which different types of exercise might improve brain health or attenuate the cognitive and mental  
578 health declines observed in patients with CAD remain to be elucidated. Well-designed intervention  
579 studies unraveling the effects and mechanisms by which exercise impacts brain health in patients with  
580 CAD will have important clinical and scientific implications. The findings will facilitate moving  
581 towards a more ‘personalized medicine’ approach to exercise prescription in patients with CAD. Thus,  
582 the present work provides a comprehensive description of the HEART-BRAIN RCT, following the  
583 SPIRIT guidelines for interventional RCTs (30-32). The HEART-BRAIN project aims to examine the  
584 effects of two different 12-week supervised exercise interventions (HIIT and HIIT combined with  
585 resistance training) compared to usual care on brain and cardiovascular health in patients with CAD.  
586 The primary outcome is CBF assessed by a cutting-edge technique called ASL-MRI.

587 Among the few studies that have evaluated the effects of exercise on brain health in individuals with  
588 CAD, most of them have focused on health-related quality of life and mental health outcomes (72,

589 73). Other key domains of brain health such as cognition, biological markers of brain health, brain  
590 morphology and function, or cerebrovascular outcomes remain unexplored.

591 This study will contribute to the advancement of scientific knowledge in different ways. Firstly, it  
592 stands as an innovative intervention of two different exercise programs in accordance with the most  
593 updated guidelines (23, 35, 50, 51). By providing a comprehensive description and pre-specified plan  
594 of the study protocol, we ensure transparency and enable the scientific community to replicate the  
595 protocols and intervention, fostering the dissemination of scientific knowledge. We expect that the  
596 intervention and the obtained results will serve as a valuable resource for healthcare and exercise  
597 professionals, allowing them to effectively prescribe individualized exercise to patients with CAD.  
598 This represents an effective transfer of scientific knowledge to practical settings. This study  
599 underscores the importance of systematic and well-defined methodological reports addressing the  
600 transparency gaps within the scientific community and facilitating the comprehensive sharing of study  
601 information.

### 602 **3.1 Strengths and limitations**

603 HEART-BRAIN has several strengths that bolster the reliability and validity of the expected results,  
604 such as: i) well-designed RCT framework ensuring random allocation of participants, minimizing  
605 selection bias, and enhancing the validity of the causal inferences drawn from the data; ii) extensive  
606 brain health mapping, including comprehensive assessments of the different domains of brain health;  
607 iii) comprehensive set of variables, including objective, gold-standard test (e.g., CPET) and patient-  
608 reported outcomes (e.g., QoL) to encompass both physical and brain health; iv) continuous heart rate  
609 monitoring throughout the exercise sessions allowing for a rigorous compliance analysis, v) time and  
610 (estimated) caloric matched exercise groups, ensuring that any observed effects can be attributable to  
611 the type of exercise rather than differences in exercise duration or intensity; vi) flexibility is offered to

612 help participants overcome barriers frequently reported about exercise participation (e.g., trainers adapt  
613 to the time that fits best participants' schedule); vii) our mechanistic approach will provide insights on  
614 how exercise can impact brain health in patients with CAD and the potential mechanisms explaining  
615 the heart-brain connection, such as changes in CBF; and viii) this study holds significant clinical  
616 relevance as it specifically targets potential improvements in brain health among patients with CAD, a  
617 population known to experience accelerated cognitive decline.

618 The study also has some limitations that must be acknowledged. Since the HEART-BRAIN RCT is  
619 implementing HIIT, certain criteria have been established to maximize safety. For example, only  
620 individuals with a stable and controlled disease during the outpatient phase will be included. Future  
621 trials recruiting a more generalizable group of patients with CAD (i.e., including individuals in a more  
622 severe condition) are needed. Further, our study is of relative short duration (12 weeks). While notable  
623 physiological changes may manifest within this timeframe, certain significant adaptations may require  
624 a longer intervention and follow-up period. Although inherent to exercise-based RCTs, another  
625 limitation is the single (and not double) blinding. These limitations should be taken into consideration  
626 when interpreting the study's findings.

#### 627 **4 Acknowledgments**

628 We thank Dr. Veronica Cabanas-Sanchez for performing the randomization of the study.

#### 629 **5 Conflict of Interest**

630 The authors declare that the research is being conducted in the absence of any commercial or  
631 financial relationships that could be construed as a potential conflict of interest.

#### 632 **6 Author Contributions**

633 Conceptualization and project direction: FBO (principal investigator); Project coordination: AT;  
634 Writing - original draft: AT, FBO; Writing - review & editing: AT, PSU, EAB, IMF, SVA, AC, IEC,  
635 FBO. Formal analysis: EAB, PSU, FBO. All authors contributed intellectually to the design and  
636 development of the methodology and approved the final manuscript of this study protocol. Our  
637 authorship aligns with the ICMJE author contributions criteria (74).

638

## 639 **7 Funding**

640 The HEART-BRAIN Project is supported with the Grant PID2020-120249RB-I00 funded by  
641 MCIN/AEI/10.13039/501100011033. Additional support was obtained from the Andalusian  
642 Government (Junta de Andalucía, Plan Andaluz de Investigación, ref. P20\_00124) and the CIBER de  
643 Fisiopatología de la Obesidad y Nutrición (CIBEROBN), Instituto de Salud Carlos III, Granada, Spain.  
644 Moreover, EAB has received funding from the European Union’s Horizon 2020 research and  
645 innovation programme under the Marie Skłodowska-Curie grant agreement No [101064851]. AT has  
646 received funding from the Junta de Andalucía, Spain, under the Postdoctoral Research Fellows (Ref.  
647 POSTDOC\_21\_00745). PS-U is supported by a “Margarita Salas” grant from the Spanish Ministry  
648 Universities. IEC is supported by RYC2019-027287-I grant funded by  
649 MCIN/AEI/10.13039/501100011033/ and “ESF Investing in your future”. IMF is supported by the  
650 Spanish Ministry of Science, Innovation and Universities (JDC2022-049642-I). AC was funded by  
651 postdoctoral research grants from the Swedish Heart-Lung Foundation (grant number 20230343), the  
652 County Council of Ostergotland, Sweden (grant number RÖ-990967), the Swedish Society of  
653 Cardiology, and the Swedish Society of Clinical Physiology. BFG is supported by the Spanish Ministry  
654 of Education, Culture and Sport (PID2022-137399OB-I00) funded by  
655 MCIN/AEI/10.13039/501100011033 and FSE+. MOR, LSA and JFO are supported by the Spanish  
656 Ministry of Science, Innovation and Universities (FPU 22/02476, FPU 21/06192 and FPU 22/03052,  
657 respectively). JHM is supported by the Spanish Ministry of Science, Innovation and Universities under  
658 Beatriz Galindo’s 2022 fellowship program (BG22/00075). JSM is supported by the National Agency  
659 for Research and Development (ANID)/Scholarship Program/DOCTORADO BECAS CHILE/2022–  
660 (Grant N°72220164). SVA is supported by a Health and Behavior International Collaborative Award  
661 by the Society of Behavioral Medicine. This work is part of a PhD thesis conducted in the Doctoral  
662 Programme in Biomedicine of the University of Granada, Granada, Spain.

663 The sponsors or funding agencies had no role in the design and conduct of the study, in the collection,  
664 analysis, and interpretation of data, in the preparation of the manuscript, or in the review or approval  
665 of the manuscript.

666

667           **REFERENCES**

- 668       1.       Stark B, Johnson C, Roth GA. Global prevalence of coronary artery disease: An update from  
669       the global burden of disease study. *Journal of the American College of Cardiology*.  
670       2024;83(13\_Supplement):2320-.
- 671       2.       WHO. Cardiovascular diseases (CVDs). World Health Organization; 2021 11 June 2021.
- 672       3.       Tsao CW, Aday AW, Almarzooq ZI, Anderson CA, Arora P, Avery CL, et al. Heart disease  
673       and stroke statistics—2023 update: a report from the American Heart Association. *Circulation*.  
674       2023;147(8):e93-e621.
- 675       4.       Timmis A, Vardas P, Townsend N, Torbica A, Katus H, De Smedt D, et al. European Society  
676       of Cardiology: cardiovascular disease statistics 2021. *J European Heart Journal*. 2022;43(8):716-99.
- 677       5.       Malakar AK, Choudhury D, Halder B, Paul P, Uddin A, Chakraborty S. A review on  
678       coronary artery disease, its risk factors, and therapeutics. *Journal of cellular physiology*.  
679       2019;234(10):16812-23.
- 680       6.       Luengo-Fernandez R, Walli-Attaei M, Gray A, Torbica A, Maggioni AP, Huculeci R, et al.  
681       Economic burden of cardiovascular diseases in the European Union: a population-based cost study.  
682       *Eur Heart J*. 2023;44(45):4752-67.
- 683       7.       Vaccarino V, Badimon L, Bremner JD, Cenko E, Cubedo J, Dorobantu M, et al. Depression  
684       and coronary heart disease: 2018 position paper of the ESC working group on coronary  
685       pathophysiology and microcirculation. *European heart journal*. 2020;41(17):1687-96.
- 686       8.       Tully PJ, Cosh SM, Baumeister H. The anxious heart in whose mind? A systematic review  
687       and meta-regression of factors associated with anxiety disorder diagnosis, treatment and morbidity  
688       risk in coronary heart disease. *Journal of psychosomatic research*. 2014;77(6):439-48.
- 689       9.       Roger VL. The heart–brain connection: from evidence to action. *European heart journal*.  
690       2017;38(43):3229-31.
- 691       10.      Schievink SH, van Boxtel MP, Deckers K, van Oostenbrugge RJ, Verhey FR, Köhler S.  
692       Cognitive changes in prevalent and incident cardiovascular disease: a 12-year follow-up in the  
693       Maastricht Aging Study (MAAS). *European heart journal*. 2022;43(7):e2-e9.
- 694       11.      van Buchem MA, Biessels GJ, Brunner la Rocca HP, de Craen AJ, van der Flier WM, Ikram  
695       MA, et al. The heart-brain connection: a multidisciplinary approach targeting a missing link in the  
696       pathophysiology of vascular cognitive impairment. *Journal of Alzheimer's Disease*.  
697       2014;42(s4):S443-S51.
- 698       12.      Virani SS, Newby LK, Arnold SV, Bittner V, Brewer LC, Demeter SH, et al. 2023  
699       AHA/ACC/ACCP/ASPC/NLA/PCNA Guideline for the Management of Patients With Chronic  
700       Coronary Disease: A Report of the American Heart Association/American College of Cardiology  
701       Joint Committee on Clinical Practice Guidelines. *Circulation*. 2023;148(9):e9-e119.
- 702       13.      Dibben GO, Faulkner J, Oldridge N, Rees K, Thompson DR, Zwisler AD, et al. Exercise-  
703       based cardiac rehabilitation for coronary heart disease: a meta-analysis. *Eur Heart J*. 2023;44(6):452-  
704       69.
- 705       14.      Pelliccia A, Sharma S, Gati S, Bäck M, Börjesson M, Caselli S, et al. 2020 ESC Guidelines  
706       on sports cardiology and exercise in patients with cardiovascular disease. *Eur Heart J*. 2021;42(1):17-  
707       96.

- 708 15. Sandercock G, Hurtado V, Cardoso F. Changes in cardiorespiratory fitness in cardiac  
709 rehabilitation patients: a meta-analysis. *International journal of cardiology*. 2013;167(3):894-902.
- 710 16. Daulatzai MA. Cerebral hypoperfusion and glucose hypometabolism: Key pathophysiological  
711 modulators promote neurodegeneration, cognitive impairment, and Alzheimer's disease. *Journal of*  
712 *neuroscience research*. 2017;95(4):943-72.
- 713 17. Han H, Zhang R, Liu G, Qiao H, Chen Z, Liu Y, et al. Reduction of cerebral blood flow in  
714 community-based adults with subclinical cerebrovascular atherosclerosis: A 3.0 T magnetic  
715 resonance imaging study. *Neuroimage*. 2019;188:302-8.
- 716 18. Long JM, Holtzman DM. Alzheimer disease: an update on pathobiology and treatment  
717 strategies. *Cell Metabolism*. 2019;179(2):312-39.
- 718 19. Rogers RL, Meyer JS, Mortel KF. After reaching retirement age physical activity sustains  
719 cerebral perfusion and cognition. *Journal of the American Geriatrics Society*. 1990;38(2):123-8.
- 720 20. Swain RA, Harris AB, Wiener EC, Dutka MV, Morris HD, Theien BE, et al. Prolonged  
721 exercise induces angiogenesis and increases cerebral blood volume in primary motor cortex of the  
722 rat. *Neuroscience*. 2003;117(4):1037-46.
- 723 21. Suzuki Y, Helle M, Koken P, Van Cauteren M, van Osch MJ. Simultaneous acquisition of  
724 perfusion image and dynamic MR angiography using time-encoded pseudo-continuous ASL.  
725 *Magnetic Resonance in Medicine*. 2018;79(5):2676-84.
- 726 22. Taylor RS, Brown A, Ebrahim S, Jolliffe J, Noorani H, Rees K, et al. Exercise-based  
727 rehabilitation for patients with coronary heart disease: systematic review and meta-analysis of  
728 randomized controlled trials. *The American journal of medicine*. 2004;116(10):682-92.
- 729 23. Bull FC, Al-Ansari SS, Biddle S, Borodulin K, Buman MP, Cardon G, et al. World Health  
730 Organization 2020 guidelines on physical activity and sedentary behaviour. *British journal of sports*  
731 *medicine*. 2020;54(24):1451-62.
- 732 24. Byrne RA, Rossello X, Coughlan J, Barbato E, Berry C, Chieffo A, et al. 2023 ESC  
733 Guidelines for the management of acute coronary syndromes: Developed by the task force on the  
734 management of acute coronary syndromes of the European Society of Cardiology (ESC). *J European*  
735 *heart journal*. 2023;44(38):3720-826.
- 736 25. Committee PAGA. 2018 physical activity guidelines advisory committee scientific report. US  
737 Department of Health and Human Services Washington, DC; 2018.
- 738 26. Lang JJ, Prince SA, Merucci K, Cadenas-Sanchez C, Chaput JP, Fraser BJ, et al.  
739 Cardiorespiratory fitness is a strong and consistent predictor of morbidity and mortality among  
740 adults: an overview of meta-analyses representing over 20.9 million observations from 199 unique  
741 cohort studies. *British journal of sports medicine*. 2024.
- 742 27. Ross R, Blair SN, Arena R, Church TS, Després J-P, Franklin BA, et al. Importance of  
743 assessing cardiorespiratory fitness in clinical practice: a case for fitness as a clinical vital sign: a  
744 scientific statement from the American Heart Association. *Circulation*. 2016;134(24):e653-e99.
- 745 28. Maleki S, Hendrikse J, Chye Y, Caeyenberghs K, Coxon JP, Oldham S, et al. Associations of  
746 cardiorespiratory fitness and exercise with brain white matter in healthy adults: A systematic review  
747 and meta-analysis. *Brain imaging and behavior*. 2022;16(5):2402-25.
- 748 29. Smith EC, Pizzey FK, Askew CD, Mielke GI, Ainslie PN, Coombes JS, et al. Effects of  
749 cardiorespiratory fitness and exercise training on cerebrovascular blood flow and reactivity: a



- 750 systematic review with meta-analyses. *American journal of physiology Heart and circulatory*  
751 *physiology*. 2021;321(1):H59-h76.
- 752 30. Chan AW, Tetzlaff JM, Altman DG, Laupacis A, Gøtzsche PC, Krleža-Jerić K, et al. SPIRIT  
753 2013 statement: defining standard protocol items for clinical trials. *Ann Intern Med*.  
754 2013;158(3):200-7.
- 755 31. Chan AW, Tetzlaff JM, Gøtzsche PC, Altman DG, Mann H, Berlin JA, et al. SPIRIT 2013  
756 explanation and elaboration: guidance for protocols of clinical trials. *Bmj*. 2013;346:e7586.
- 757 32. Butcher NJ, Monsour A, Mew EJ, Chan A-W, Moher D, Mayo-Wilson E, et al. Guidelines  
758 for reporting outcomes in trial protocols: the SPIRIT-outcomes 2022 extension. *JAMA cardiology*.  
759 2022;328(23):2345-56.
- 760 33. Schulz KF, Altman DG, Moher D. CONSORT 2010 Statement: updated guidelines for  
761 reporting parallel group randomised trials. *BMC medicine*. 2010;8:18.
- 762 34. Harris PA, Taylor R, Minor BL, Elliott V, Fernandez M, O'Neal L, et al. The REDCap  
763 consortium: building an international community of software platform partners. *Journal of*  
764 *biomedical informatics*. 2019;95:103208.
- 765 35. Taylor JL, Holland DJ, Spathis JG, Beetham KS, Wisløff U, Keating SE, et al. Guidelines for  
766 the delivery and monitoring of high intensity interval training in clinical populations. *Progress in*  
767 *cardiovascular diseases*. 2019;62(2):140-6.
- 768 36. Morishita S, Tsubaki A, Nakamura M, Nashimoto S, Fu JB, Onishi H. Rating of perceived  
769 exertion on resistance training in elderly subjects. *Expert review of cardiovascular therapy*.  
770 2019;17(2):135-42.
- 771 37. Rognmo Ø, Moholdt T, Bakken H, Hole T, Mølstad P, Myhr NE, et al. Cardiovascular risk of  
772 high-versus moderate-intensity aerobic exercise in coronary heart disease patients. *Circulation*.  
773 2012;126(12):1436-40.
- 774 38. Wewege MA, Ahn D, Yu J, Liou K, Keech A. High-intensity interval training for patients  
775 with cardiovascular disease—is it safe? A systematic review. *Journal of the American Heart*  
776 *Association*. 2018;7(21):e009305.
- 777 39. Taylor JL, Holland DJ, Keating SE, Leveritt MD, Gomersall SR, Rowlands AV, et al. Short-  
778 term and Long-term Feasibility, Safety, and Efficacy of High-Intensity Interval Training in Cardiac  
779 Rehabilitation: The FITR Heart Study Randomized Clinical Trial. *JAMA Cardiol*. 2020;5(12):1382-  
780 9.
- 781 40. Gallagher RM, Kirkham JJ, Mason JR, Bird KA, Williamson PR, Nunn AJ, et al.  
782 Development and inter-rater reliability of the Liverpool adverse drug reaction causality assessment  
783 tool. *PloS one*. 2011;6(12):e28096.
- 784 41. Shah S. Common terminology criteria for adverse events. National Cancer Institute: USA.  
785 2022.
- 786 42. Kilroy E, Apostolova L, Liu C, Yan L, Ringman J, Wang DJ. Reliability of two-dimensional  
787 and three-dimensional pseudo-continuous arterial spin labeling perfusion MRI in elderly populations:  
788 comparison with 15O-water positron emission tomography. *Journal of magnetic resonance imaging* :  
789 *JMRI*. 2014;39(4):931-9.
- 790 43. Wang DJ, Alger JR, Qiao JX, Gunther M, Pope WB, Saver JL, et al. Multi-delay multi-  
791 parametric arterial spin-labeled perfusion MRI in acute ischemic stroke - Comparison with dynamic  
792 susceptibility contrast enhanced perfusion imaging. *NeuroImage Clinical*. 2013;3:1-7.

- 793 44. Ojeda N, del Pino R, Ibarretxe-Bilbao N, Schretlen D, Peña J. Test de evaluación cognitiva de  
794 Montreal: normalización y estandarización de la prueba en población española. *Revista de*  
795 *neurología*. 2016;63(11):488-96 % @ 0210-010.
- 796 45. Reitan RM. Validity of the Trail Making Test as an indicator of organic brain damage.  
797 *Perceptual and motor skills*. 1958;8(3):271-6 % @ 0031-5125.
- 798 46. Wechsler D. *WAIS-IV: Escala Wechsler de inteligencia para adultos-IV*. 2008.
- 799 47. Zelazo PD, Anderson JE, Richler J, Wallner-Allen K, Beaumont JL, Weintraub S. II. NIH  
800 *Toolbox Cognition Battery (CB): measuring executive function and attention*. *Monogr Soc Res Child*  
801 *Dev*. 2013;78(4):16-33.
- 802 48. Erickson KI, Voss MW, Prakash RS, Basak C, Szabo A, Chaddock L, et al. Exercise training  
803 increases size of hippocampus and improves memory. *Proc Natl Acad Sci U S A*. 2011;108(7):3017-  
804 22.
- 805 49. Solis-Urra P, Molina-Hidalgo C, García-Rivero Y, Costa-Rodriguez C, Mora-Gonzalez J,  
806 Fernandez-Gamez B, et al. Active Gains in brain Using Exercise During Aging (AGUEDA): protocol  
807 for a randomized controlled trial. *Front Hum Neurosci*. 2023;17:1168549.
- 808 50. Bayles MP. *ACSM's exercise testing and prescription: Lippincott williams & wilkins*; 2023.
- 809 51. Mezzani A, Hamm LF, Jones AM, McBride PE, Moholdt T, Stone JA, et al. Aerobic exercise  
810 intensity assessment and prescription in cardiac rehabilitation: a joint position statement of the  
811 European Association for Cardiovascular Prevention and Rehabilitation, the American Association of  
812 Cardiovascular and Pulmonary Rehabilitation, and the Canadian Association of Cardiac  
813 Rehabilitation. *Journal of cardiopulmonary rehabilitation and prevention*. 2012;32(6):327-50.
- 814 52. Shao X, Ma SJ, Casey M, D'Orazio L, Ringman JM, Wang DJJ. Mapping water exchange  
815 across the blood-brain barrier using 3D diffusion-prepared arterial spin labeled perfusion MRI. *Magn*  
816 *Reson Med*. 2019;81(5):3065-79.
- 817 53. Williams B, Mancia G, Spiering W, Agabiti Rosei E, Azizi M, Burnier M, et al. 2018  
818 *ESC/ESH Guidelines for the management of arterial hypertension*. *Eur Heart J*. 2018;39(33):3021-  
819 104.
- 820 54. Langhammer B, Stanghelle JK. The Senior Fitness Test. *Journal of physiotherapy*.  
821 2015;61(3):163.
- 822 55. Merellano-Navarro E, Collado-Mateo D, García-Rubio J, Gusi N, Olivares PR. Validity of  
823 the International Fitness Scale "IFIS" in older adults. *Experimental gerontology*. 2017;95:77-81.
- 824 56. Izal M, Montorio I. Adaptation of the Geriatric Depression Scale in Spain: A preliminary  
825 study. *Clinical Gerontologist*. 1993;13(2):83-91.
- 826 57. Zigmond AS, Snaith RP. The hospital anxiety and depression scale. *Acta psychiatrica*  
827 *Scandinavica*. 1983;67(6):361-70.
- 828 58. Remor E. Psychometric Properties of a European Spanish Version of the Perceived Stress  
829 Scale (PSS). *The Spanish Journal of Psychology*. 2006;9(1):86-93.
- 830 59. Russell D, Peplau LA, Cutrona CE. The revised UCLA Loneliness Scale: concurrent and  
831 discriminant validity evidence. *Journal of personality and social psychology*. 1980;39(3):472-80.
- 832 60. Robins R. Measuring global self-esteem: Construct validation of a single-item measure and  
833 the Rosenberg self-esteem scale. *Personality Social Psychology Bulletin*. 2001;27:151-61.

- 834 61. Cutrona CE, Russell DW. The provisions of social relationships and adaptation to stress.  
835 *Advances in personal relationships*. 1987;1(1):37-67.
- 836 62. Alonso J, Prieto L, Antó J. The Spanish version of the SF-36 Health Survey (the SF-36 health  
837 questionnaire): an instrument for measuring clinical results. *Medicina clínica*. 1995;104(20):771-6.
- 838 63. Migueles JH, Rowlands AV, Huber F, Sabia S, van Hees VT. GGIR: a research community–  
839 driven open source R package for generating physical activity and sleep outcomes from multi-day  
840 raw accelerometer data. *Journal for the Measurement of Physical Behaviour*. 2019;2(3):188-96.
- 841 64. Troiano RP, Stamatakis E, Bull FC. How can global physical activity surveillance adapt to  
842 evolving physical activity guidelines? Needs, challenges and future directions. *British journal of*  
843 *sports medicine*. 2020;54(24):1468-73.
- 844 65. Li G, Taljaard M, Van den Heuvel ER, Levine MA, Cook DJ, Wells GA, et al. An  
845 introduction to multiplicity issues in clinical trials: the what, why, when and how. *International*  
846 *journal of epidemiology*. 2017;46(2):746-55.
- 847 66. Anderson L, Oldridge N, Thompson DR, Zwisler A-D, Rees K, Martin N, et al. Exercise-  
848 Based Cardiac Rehabilitation for Coronary Heart Disease: Cochrane Systematic Review and Meta-  
849 Analysis. *Journal of the American College of Cardiology*. 2016;67(1):1-12.
- 850 67. Goldhammer E, Tanchilevitch A, Maor I, Beniamini Y, Rosenschein U, Sagiv M. Exercise  
851 training modulates cytokines activity in coronary heart disease patients. *International Journal of*  
852 *Cardiology*. 2005;100(1):93-9.
- 853 68. Niessner A, Richter B, Penka M, Steiner S, Strasser B, Ziegler S, et al. Endurance training  
854 reduces circulating inflammatory markers in persons at risk of coronary events: impact on plaque  
855 stabilization? *Atherosclerosis*. 2006;186(1):160-5.
- 856 69. Lavie CJ, Milani RV. Cardiac Rehabilitation and Exercise Training in Secondary Coronary  
857 Heart Disease Prevention. *Progress in Cardiovascular Diseases*. 2011;53(6):397-403.
- 858 70. Pareja-Galeano H, Garatachea N, Lucia A. Exercise as a polypill for chronic diseases.  
859 *Progress in Molecular Biology & Translational Science*
- 860 2015;135:497-526.
- 861 71. Muscella A, Stefano E, Marsigliante S. The effects of exercise training on lipid metabolism  
862 and coronary heart disease. *American journal of physiology Heart and circulatory physiology*.  
863 2020;319(1):H76-h88.
- 864 72. Gomes-Neto M, Duraes AR, Reis HFCd, Neves VR, Martinez BP, Carvalho VO. High-  
865 intensity interval training versus moderate-intensity continuous training on exercise capacity and  
866 quality of life in patients with coronary artery disease: A systematic review and meta-analysis. *J*  
867 *European Journal of Preventive Cardiology*. 2017;24(16):1696-707.
- 868 73. Yu H, Zhao X, Wu X, Yang J, Wang J, Hou L. High-intensity interval training versus  
869 moderate-intensity continuous training on patient quality of life in cardiovascular disease: a  
870 systematic review and meta-analysis. *Scientific Reports*. 2023;13(1):13915.
- 871 74. Editors ICoMJ. Defining the role of authors and contributors. 2018.
- 872 75. Muñoz-García M, Cervantes S, Razquin C, Guillén-Grima F, Toledo JB, Martínez-González  
873 M, et al. Validation study of a Spanish version of the modified Telephone Interview for Cognitive  
874 Status (STICS-m). *Gaceta sanitaria*. 2019;33(5):415-20.

875 76. Brandt J, Spencer M, Folstein M. The Telephone Interview for Cognitive Status.  
876 Neuropsychiatry, Neuropsychology, & Behavioral Neurology. 1988;1(2):111-7.

877

## FIGURES AND TABLES

# HEART-BRAIN TRIAL PARTICIPANTS FLOW

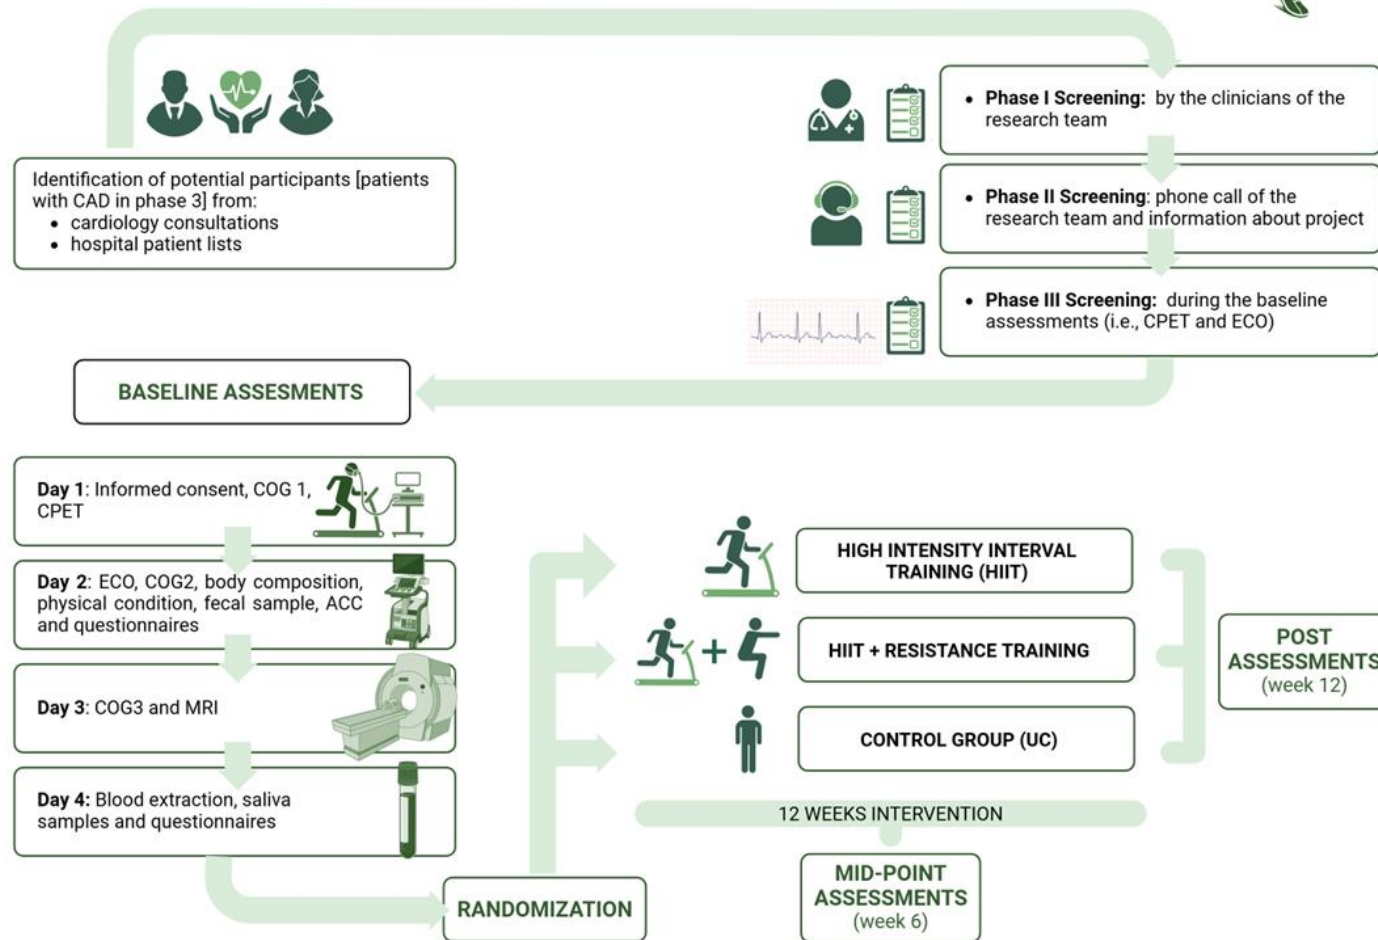

**Figure 1.** Visual representation of the study design in the HEART-BRAIN trial. ACC: Accelerometry; CAD: coronary artery disease; CPET: cardiopulmonary exercise test; ECO: echography; COG; cognitive function tests; MRI: magnetic resonance imaging UC: usual care. \*Post-intervention assessment includes similar outcomes compared to baseline assessment.

**Table 1.** HEART-BRAIN inclusion and exclusion criteria for selecting participants.

---

**INCLUSION CRITERIA:**

---

1. Men and women aged 50 - 75 years old, both inclusive (\*Contingency plan: increase the range to 40-75 if we have difficulties to get the study sample)
2. Must have stable coronary artery disease (phase III), proven by invasive coronary angiography or CT with at least one coronary stenosis with > 50% luminal reduction.
3. Able to speak and read fluent Spanish.
4. Living in Granada city or surrounding areas (able to come to evaluations and exercise program)
5. Living in the community during the study (i.e. independent home, non-assisted living facilities)
6. Left ventricular ejection fraction  $\geq$  45%, determined by echocardiography
7. Functional grade I-II according to the New York Heart Association (NYHA) scale.
8. Sinus rhythm.
9. Stable optimal medical treatment (determined by a cardiologist).
10. Physically inactive, considering: 1) not meeting the WHO recommendations in neither the aerobic nor strength part, and 2) not participating in a planned and structured exercise program at least 3 days per week for the last 3 months. Both conditions must be met to be included and will be ascertained during a screening phone call. Note: going for a walk will not be considered an exclusion reason.
11. No signs of manifest cognitive disorder according to the Spanish Telephone Interview for Cognitive Status-modified (STICS-m) scoring of 26 and above (75, 76).

---

**EXCLUSION CRITERIA:**

---

1. Use of assisted walking devices.
2. Acute coronary syndrome in the last year.
3. Coronary artery by-pass surgery or percutaneous intervention in the last 6 months.
4. Treatment for any type of cancer in the last 2 years.
5. Hospitalization in the intensive care unit in the last 6 months.
6. Current psychiatric diagnosis (visit to psychiatrist and drug treatment prescription in the last year), including major depression and history of psychiatric illness (schizophrenia, bipolar disorder, hallucinations).
7. Grade III obesity (BMI > 40).
8. Diagnosis of neurological or cerebrovascular disorder (e.g., stroke).
9. Medical contraindication for inclusion in an exercise program.
10. Diabetes with uncontrolled hyperglycemia.
11. Resting blood pressure > 180/110 mmHg.
12. Exercise-induced chest pain or changes in the ST segment suggestive of severe ischemia during exercise testing
13. Severe inducible ischemia
14. Low functional capacity in ergometry (<5 METS).
15. Obstructive left main artery disease (significant disease > 50% obstruction)
16. Unstable angina
17. Uncontrolled cardiac arrhythmia
18. Presence of metal implants (e.g., pacemaker or implantable cardioverter-defibrillator-ICD) not compatible with MRI (reported during the phone screening)

19. Paroxysmal or persistent atrial fibrillation with episodes in the last 6 months.
20. Moderate to severe pulmonary hypertension.
21. Acute endocarditis, myocarditis, or pericarditis.
22. Moderate to severe heart valve disease (grade 3-4)
23. Acute pulmonary embolism, or deep vein thrombosis.
24. Aortic dissection
25. High-grade heart block or complete left bundle branch block or altered basal electrocardiogram with difficulties to interpret in exercise testing.
26. Hypertrophic obstructive cardiomyopathy.
27. Retinopathy.
28. Severe autonomic or peripheral neuropathy.
29. Acute systemic illness or fever.
30. Acute or chronic renal failure (estimated glomerular filtration rate < 30 mL/min)
31. Pulmonary fibrosis or interstitial disease (respiratory failure or severe COPD confirmed by pneumological study).
32. Recent treatment for alcohol or substance abuse.
33. Claustrophobia.
34. Any surgery or medical intervention planned during the study period.
35. Plans to participate or current participation in other studies that might interfere with this study.
36. Current pregnancy or intention to get pregnant during the study period.

---

CT: computer tomography; METS: metabolic equivalent; COPD: Chronic obstructive pulmonary disease

**Table 2.** Outcomes instruments and time points of data collection.

| Outcomes                                         | Instrument / Tool                                                                                                                                                                             | Pre | Mid | Post |
|--------------------------------------------------|-----------------------------------------------------------------------------------------------------------------------------------------------------------------------------------------------|-----|-----|------|
| <b>PRIMARY OUTCOME</b>                           |                                                                                                                                                                                               |     |     |      |
| Cerebral blood flow                              | MRI: turbo gradient spin echo-pseudo continuous arterial spin labeling                                                                                                                        | x   |     | x    |
| <b>SECONDARY OUTCOMES</b>                        |                                                                                                                                                                                               |     |     |      |
| Cerebral vascularization                         | MRA: Time-of-flight angiography                                                                                                                                                               | x   |     | x    |
| Executive function                               | Desing Substitution Symbol Test; Trail Making Test; Spatial Working Memory Test (E-prime); Dimensional Card Sort Test; Flanker Test; Picture Sequence Test; and List Sort Working Memory Test | x   |     | x    |
| General cognition                                | Montreal Cognitive Assessment test (MOCA)                                                                                                                                                     | x   |     | x    |
| Cardiorespiratory fitness                        | Treadmill Cardiorespiratory exercise test with gas exchange analysis                                                                                                                          | x   |     | x    |
| <b>OTHER OUTCOMES</b>                            |                                                                                                                                                                                               |     |     |      |
| <b>Brain structure and function</b>              |                                                                                                                                                                                               |     |     |      |
| Blood brain barrier permeability                 | MRI: 3D diffusion-prepared arterial spin labelled perfusion                                                                                                                                   | x   |     | x    |
| Brain morphology                                 | MRI: T1-weighted MPRAGE structural                                                                                                                                                            | x   |     | x    |
| White matter structure                           | MRI: Diffusion weighted acquisition                                                                                                                                                           | x   |     | x    |
| Brain function                                   | Functional MRI: Resting state echo planar imaging                                                                                                                                             | x   |     | x    |
| <b>Biological samples</b>                        |                                                                                                                                                                                               |     |     |      |
| Neurology biomarkers                             |                                                                                                                                                                                               |     |     |      |
| Inflammatory biomarkers                          | Blood and saliva samples (type of analysis to be determinate with the best method available at moment of analysis)                                                                            | x   |     | x    |
| Cardiovascular biomarkers                        | Blood samples (type of analysis to be determinate with the best method available at moment of analysis)                                                                                       | x   |     | x    |
| Gene expression and epigenetics                  | Genetic analysis in blood and saliva samples (qRT-PCR and others to be determinate with the best method available at moment of analysis)                                                      | x   |     | x    |
| Oral and gut microbiota                          | Saliva and fecal samples                                                                                                                                                                      | x   |     | x    |
| <b>Hemodynamics</b>                              |                                                                                                                                                                                               |     |     |      |
| Vascular hemodynamics                            | Carotid ultrasound                                                                                                                                                                            | x   |     | x    |
| Cardiac hemodynamics                             | Echocardiography                                                                                                                                                                              | x   |     | x    |
| Transcranial hemodynamics                        | Transcranial ultrasound                                                                                                                                                                       | x   |     | x    |
| Blood pressure                                   | Blood pressure monitor                                                                                                                                                                        | x   |     | x    |
| Arterial stiffness                               | Carotid-femoral pulse wave velocity, SphygmoCor XCEL                                                                                                                                          | x   |     | x    |
| <b>Physical functioning and body composition</b> |                                                                                                                                                                                               |     |     |      |
| Muscle strength                                  | Chair stand test, arm curl test and hand dynamometer TKK 5101                                                                                                                                 | x   |     | x    |
| Physical function                                | Senior Fitness Test and 6-min walking test                                                                                                                                                    | x   |     | x    |
| Body composition                                 | Dual-energy x-ray absorptiometer (DXA) and a TANITA's Bioelectrical Impedance Analysis                                                                                                        | x   |     | x    |
| <b>Mental health and behaviour</b>               |                                                                                                                                                                                               |     |     |      |
| Depression                                       | Hospital Anxiety and Depression Scale                                                                                                                                                         | x   |     | x    |
| Anxiety                                          | Hospital Anxiety and Depression Scale                                                                                                                                                         | x   |     | x    |
| Stress                                           | Perceived Stress Scale                                                                                                                                                                        | x   |     | x    |
| Loneliness                                       | UCLA Loneliness Scale                                                                                                                                                                         | x   |     | x    |



|                                |                                                                                                                               |   |   |   |
|--------------------------------|-------------------------------------------------------------------------------------------------------------------------------|---|---|---|
| Self-esteem                    | Rosenberg Self-Esteem Scale                                                                                                   | x |   | x |
| Social support                 | Social Provisions Scale                                                                                                       | x |   | x |
| Health-related quality of life | Health Survey Short Form (SF-36)                                                                                              | x |   | x |
| Physical activity              | Accelerometer Axivity AX (pre and mid), and a self-reported questionnaire based on the Global Physical Activity Questionnaire | x | x |   |
| Sedentary behavior             | Accelerometer Axivity AX (pre and mid), and a self-reported questionnaire based on the Global Physical Activity Questionnaire | x | x |   |
| Sleep duration and quality     | Accelerometer Axivity AX (pre and mid) and a self-reported questionnaire                                                      | x | x |   |
| Diet behavior                  | 14-item Questionnaire of Mediterranean Diet Adherence, and self-reported question for supplements                             | x | x | x |

### DESCRIPTIVES OR COVARIATES FOR ANALYSES

Educational level  
 Ethnicity  
 Smoking habits  
 Alcohol consumption  
 Medication  
 Comorbidities (e.g., dyslipidemia, hypertension, type 2 diabetes)  
 Family history of dementia  
 Handedness  
 COVID-19 history  
 Genotyping of APOE, BDNF and others

---

Pre: baseline assessments; mid: assessments at 6 weeks; post: assessments at 12 weeks, just after finish intervention MRI: magnetic resonance imaging; qRT-PCR: quantitative real-time polymerase chain reaction; APOE: Apolipoprotein E; BDNF: Brain-Derived Neurotrophic Factor.

**Table 3.** Brain Magnetic Resonance Imaging (MRI) parameters of the HEART-BRAIN trial

| SEQUENCE                                     | PARAMETERS                                                                                                                                                                                                                                                                        | OUTCOMES                                    | ACQUISITION TIME (MIN) |
|----------------------------------------------|-----------------------------------------------------------------------------------------------------------------------------------------------------------------------------------------------------------------------------------------------------------------------------------|---------------------------------------------|------------------------|
| TOF (Time of flight angiography)             | TR=21 ms, TE=3.43 ms, Flip angle: 18grad., FOV=200 mm, acquisition bandwidth of 155 Hz/PX, 44 slices (18.2% oversampling), resolution = 0.3×0.3×0.8 mm <sup>3</sup>                                                                                                               | Angiography (cerebral vascularization)      | 8                      |
| T1-weighted MPRAGE structural                | Sagittal, 0.8 mm isotropic resolution, TE/TI/TR = 2.31/1060/2400 ms, FOV = 256 mm, 224 slices                                                                                                                                                                                     | Brain structure                             | 6                      |
| diffusion-prepared pCASL (DP-pCASL) sequence | TR = 4 sec, TE = 36.5 ms, FOV = 224 mm, matrix size = 64×64, 12 slices (10% oversampling), resolution = 3.5×3.5×8 mm <sup>3</sup> , label/control duration = 1500 ms, centric ordering, and optimized timing of background suppression for gray matter (GM) and white matter (WM) | Blood brain barrier permeability            | 10                     |
| Resting state EPI                            | Resolution: 2.5 × 2.5 × 2.5 mm, TE/TR = 40/1000 ms, Multiband factor = 8 (CMRR EPI sequence), 64 slices, 480 measurements                                                                                                                                                         | Resting BOLD (Blood Oxygen Level Dependent) | 5                      |
| Diffusion weighted acquisition               | Resolution: 2 × 2 × 2 mm, TE/TR = 95.6/2800 ms, Multiband factor = 4, b-values of 1500, 3000 s/mm <sup>2</sup> , 64 gradient directions                                                                                                                                           | White matter microstructure                 | 8                      |
| pCASL TGSE                                   | 3D GRASE pCASL sequence, Resolution: 3.1 × 3.1 × 2.5 mm, TE/TR = 23.64/4300 ms, 48 slices, Multiple Post-labeling delay [0.5, 0.5, 1, 1, 1.5, 1.5, 2.0, 2.0, 2.0 s], Background Suppression, 9 measurements for labeling and control, 4 segment readout                           | Cerebral blood flow                         | 6                      |
| MRI-Abdominal                                | Resolution: 2 × 2 × 2 mm, TE1-2/TR = 1.23-2.46/5.21 ms, flip angle 9°, CAIPIRINHA iPAT factor = 4, FOV = 448 mm                                                                                                                                                                   | Visceral adipose tissue                     | 5                      |

FOV: Field of View; Hz: hertz; PX: pixel; MPRAGE: Magnetization Prepared Rapid Gradient Echo; pCASL: pseudo-Continuous Arterial Spin Labelling; TE: Echo Time; TI: Inversion Time; TR: Repetition Time; EPI: Echo Planar Imaging; TGSE: Turbo Gradient Spin-Echo

**Table 4.** Cognitive tests included in the HEART-BRAIN trial.

| <b>Cognitive test</b>                                     | <b>Day / session</b> | <b>Format</b>       | <b>Domain</b>                                            | <b>Time</b> |
|-----------------------------------------------------------|----------------------|---------------------|----------------------------------------------------------|-------------|
| Spanish Telephone Interview for Cognitive Status (75, 76) | Telephone screening  | Verbal              | General cognition                                        | 10 min      |
| Montreal Cognitive Assessment (44)                        | 2                    | Verbal-paper-pencil | General cognition                                        | 10 min      |
| Trail Making Test A and B (45)                            | 2                    | Paper-pencil        | Executive function: Cognitive flexibility                | 5 min       |
| Digit Symbol Substitution Test (46)                       | 2                    | Paper-pencil        | Processing speed and attention                           | 5 min       |
| Dimensional Change Card Sort Test (47)                    | 1                    | Computerized        | Executive function: Cognitive flexibility and inhibition | 5 min       |
| List Sorting Working Memory Test (47)                     | 1                    | Computerized        | Executive function: Working memory (verbal)              | 5 min       |
| Flanker Test (47)                                         | 1                    | Computerized        | Executive function: inhibitory control and attention     | 5 min       |
| Spatial Working Memory Test (48)                          | 3                    | Computerized        | Executive function: Working memory (spatial)             | 10 min      |
| Picture Sequence Memory Test (47)                         | 1                    | Computerized        | Episodic memory                                          | 5 min       |

**Table 5. Biological samples and targeted analysis plan**

| SAMPLE                             | ANALYSIS TARGET                                                                                                                                                                                                                                                                                                                                                                                                                                                                                                                                                          | PRELIMINARY ANALYSIS PLAN                                                                                                                                                                                                                                                                                                                                                                                                                                                                                                                                                                                                                                                          |
|------------------------------------|--------------------------------------------------------------------------------------------------------------------------------------------------------------------------------------------------------------------------------------------------------------------------------------------------------------------------------------------------------------------------------------------------------------------------------------------------------------------------------------------------------------------------------------------------------------------------|------------------------------------------------------------------------------------------------------------------------------------------------------------------------------------------------------------------------------------------------------------------------------------------------------------------------------------------------------------------------------------------------------------------------------------------------------------------------------------------------------------------------------------------------------------------------------------------------------------------------------------------------------------------------------------|
| <b>Blood samples</b>               |                                                                                                                                                                                                                                                                                                                                                                                                                                                                                                                                                                          |                                                                                                                                                                                                                                                                                                                                                                                                                                                                                                                                                                                                                                                                                    |
| Plasma                             | A $\beta$ (Amyloid beta) peptides A $\beta$ 1-42, A $\beta$ 1-40; BD-tau and P-tau; Neurofilament light chain (NFL); Glial fibrillary acidic protein (GFAP); Vascular endothelial growth factor (VEGF); chemokine C-X-C motif ligand 13 (CXCL-13); IgM-1; IL-17; pancreatic polypeptide (PPY); Adiponectin; Brain-derived neurotrophic factor (BDNF); Cathepsin B; vascular cell adhesion molecule 1 (VACM-1); C-reactive protein (CRP); high-sensitivity CRP; Interleukin-6 (IL-6); Interleukin-17 (IL-17); Tumor necrosis factor (TNF-Alpha); Klotho; GLP-1, Clusterin | Plasma biomarker Ab (Amyloid beta) peptides Ab1-42, Ab1-40; BD-tau and P-tau; Neurofilament light chain - NFL GFAP- concentrations will be measured using Single molecule array (Simoa) methods on an HD-X instrument and commercial assays from Quanterix. Key inflammatory biomarkers will be analyzed with automated blood cell counters and quantified by multiple analyte profiling technology (MILLIPLEX R MAP Human High Sensitivity T-Cell Magnetic Bead Panel, EMD Millipore Corporation, Missouri, U.S.A.) Klotho will be determined using a solid-phase sandwich enzyme-linked immunosorbent assay (Demeditec, Kiel, Germany) according to the manufacturer's protocol. |
| Peripheral Blood Mononuclear Cells | Telomere length                                                                                                                                                                                                                                                                                                                                                                                                                                                                                                                                                          | A commercial DNA isolation kit (Qiagen, Barcelona, Spain) will be used to extract genomic DNA from isolated PBMCs. Relative telomere length will be determined by quantitative real-time polymerase chain reaction (qRT-PCR) using the telomere/single-copy gene ratio (T/S)                                                                                                                                                                                                                                                                                                                                                                                                       |
| Serum                              | Insulin-like growth factor 1 (IGF-1); Insulin; Glucose; Glycated Hemoglobin (HbA1c), creatinine, Serum fatty acid (SFA-1), total, HDL and LDL cholesterol, glomerular filtration rate, triglycerides                                                                                                                                                                                                                                                                                                                                                                     | IGF-1, insulin, glucose, glycated hemoglobin (HbA1c) and serum fatty acids (SFA-1) will be analyzed using XMap technology (Luminex Corporation, Austin, TX) and human monoclonal antibodies (Milliplex Map Kit; Millipore, Billerica, MA). Total cholesterol, HDL-C, LDL-C, triglycerides, and glucose will be assessed using a spectrophotometer. Insulin will be assessed by chemiluminescence immunoassay.                                                                                                                                                                                                                                                                      |
| Whole Blood                        | Glycated hemoglobin (A1c), RNA and DNA analyses                                                                                                                                                                                                                                                                                                                                                                                                                                                                                                                          | Blood specimens will be used for genotyping. The genotypes will be determined using TaqMan genotyping assays (e.g., APOE). A commercial RNA isolation kit (Qiagen, Barcelona, Spain) will be used to extract total RNA from whole blood samples. The selection of specific miRNAs will be based on the existing bibliographic information. In accordance with this, the selected miRNA will be evaluated using Taqman probes.                                                                                                                                                                                                                                                      |
| <b>Saliva samples</b>              | Oral microbiota and other potential biomarkers                                                                                                                                                                                                                                                                                                                                                                                                                                                                                                                           | To be determined with the best method available at the moment of analysis                                                                                                                                                                                                                                                                                                                                                                                                                                                                                                                                                                                                          |
| <b>Fecal samples</b>               | Metagenomic Analysis of the Gut Microbiome                                                                                                                                                                                                                                                                                                                                                                                                                                                                                                                               | To be determined with the best method available at the moment of analysis                                                                                                                                                                                                                                                                                                                                                                                                                                                                                                                                                                                                          |
